# Supplementary material
Source: PubMed Central journal article supplement (PMC6649180)
Supplement: ao8b02403_si_001.pdf [file ao8b02403_si_001.pdf]

## Supplementary Information

### Establishing Cost-Effective Computational Models for the Prediction of Lanthanoid Binding in $[\text{Ln}(\text{NO}_3)]^{2+}$ (with Ln = La to Lu)

Charles C. Peterson,<sup>†,‡</sup> Deborah A. Penchoff,<sup>\*,‡</sup> John D. Auxier, II,<sup>§</sup> and Howard L. Hall<sup>\*,‡,||,§,⊥</sup>

<sup>†</sup>Research Information Technology Services, University of North Texas, 225 S. Avenue B, Denton, Texas 76201, United States

<sup>‡</sup>Institute for Nuclear Security, University of Tennessee, 1640 Cumberland Avenue, Knoxville, Tennessee 37996, United States

<sup>§</sup>Department of Nuclear Engineering, University of Tennessee, 301 Middle Dr., Pasqua Nuclear Engineering Bldg., Knoxville, Tennessee 37996, United States

<sup>||</sup>Radiochemistry Center of Excellence (RCOE), University of Tennessee, 1508 Middle Dr., Ferris Hall, Knoxville, Tennessee 37996, United States

<sup>⊥</sup>Y-12 National Security Complex, Oak Ridge, Tennessee 37830, United States

Table S.1 contains the predicted Gibbs free energy of reaction for  $[\text{Ln}(\text{NO}_3)]^{+2}$  calculated with CCSD(T)-FSI/cc-pVTZ-DK3, MP2-FSI/cc-pVTZ-DK3, CCSD(T)-FSII/cc-pwCVTZ-DK3, MP2-FSI/cc-pV $\infty$ Z, CCSD(T)-FSI/cc-pV $\infty$ Z-DK3, and CCSD(T)-FSII/cc-pCV $\infty$ Z-DK3.

Table S.2 contains the predicted Gibbs free energy of reaction for  $[\text{Ln}(\text{NO}_3)]^{+2}$  calculated with the composite Method A and Method B, and the Target Method, CCSD(T)-FSII/cc-pwCV $\infty$ Z-DK3.

Table S.3 contains absolute and relative cost for target method and f-ccCA for  $[\text{Ln}(\text{NO}_3)]^{+2}$  (with Ln = La, Ce, Sm, and Lu).

Table S.1:  $\Delta G_{\text{rxn}}$  (kcal mol<sup>-1</sup>) for [Ln(NO<sub>3</sub>)<sub>2</sub>]<sup>+</sup> calculated with CCSD(T)-FSI/cc-pVTZ-DK3, MP2-FSI/cc-pVTZ-DK3, CCSD(T)-FSII/cc-pwCVTZ-DK3, MP2-FSI/cc-pV $\infty$ Z, CCSD(T)-FSI/cc-pV $\infty$ Z-DK3, and CCSD(T)-FSII/cc-pwCV $\infty$ Z-DK3.

|    | CCSD(T)-FSI<br>/cc-pVTZ-DK3 | MP2-FSI<br>/cc-pVTZ-<br>DK3 | CCSD(T)-FSII<br>/cc-pwCVTZ-<br>DK3 | MP2-FSI<br>/cc-pV $\infty$ Z-<br>DK3 | CCSD(T)-FSI<br>/cc-pV $\infty$ Z-<br>DK3 | CCSD(T)-FSII<br>/cc-pwCV $\infty$ Z-DK3 |
|----|-----------------------------|-----------------------------|------------------------------------|--------------------------------------|------------------------------------------|-----------------------------------------|
| La | -485.96                     | -483.15                     | -485.98                            | -474.77                              | -477.37                                  | -478.62                                 |
| Ce | -493.08                     | -490.13                     | -493.36                            | -482.78                              | -485.66                                  | -485.78                                 |
| Pr | -520.85                     | -534.33                     | -528.79                            | -526.40                              | -515.14                                  | -522.59                                 |
| Nd | -514.39                     | -554.46                     | -550.55                            | -546.08                              | -519.60                                  | -544.21                                 |
| Sm | -511.78                     | -509.87                     | -511.65                            | -503.00                              | -505.33                                  | -505.80                                 |
| Eu | -460.41                     | -453.94                     | -460.52                            | -446.69                              | -452.91                                  | -452.52                                 |
| Gd | -514.80                     | -512.99                     | -515.75                            | -506.32                              | -508.22                                  | -508.19                                 |
| Tb | -521.42                     | -520.16                     | -522.13                            | -513.82                              | -515.28                                  | -514.87                                 |
| Dy | -519.91                     | -519.69                     | -520.80                            | -513.25                              | -513.55                                  | -514.33                                 |
| Ho | -581.07                     | -594.73                     | -587.95                            | -586.20                              | -577.17                                  | -581.12                                 |
| Er | -581.45                     | -603.31                     | -594.51                            | -594.94                              | -581.13                                  | -588.23                                 |
| Tm | -571.60                     | -585.99                     | -578.23                            | -578.44                              | -567.72                                  | -571.96                                 |
| Yb | -525.38                     | -575.92                     | -517.27                            | -577.29                              | -526.38                                  | -519.54                                 |
| Lu | -536.44                     | -539.04                     | -537.38                            | -533.47                              | -530.64                                  | -530.31                                 |

Table S.2:  $\Delta G_{\text{rxn}}$  (kcal mol<sup>-1</sup>) for [Ln(NO<sub>3</sub>)<sub>2</sub>]<sup>+</sup> calculated with the composite Method A and Method B, and the Target Method, CCSD(T)-FSII/cc-pwCV $\infty$ Z-DK3

|    | Method A<br>$E_{\text{ref}}[\text{MP2}] + \Delta E_{\text{cc}} + \Delta E_{\text{cv}}$ | Method B<br>$E_{\text{ref}}[\text{CCSD(T)}] + \Delta E_{\text{cv}}$ | Target method<br>CCSD(T)-FSII/cc-pwCV $\infty$ Z-DK3 |
|----|----------------------------------------------------------------------------------------|---------------------------------------------------------------------|------------------------------------------------------|
| La | -478.52                                                                                | -478.31                                                             | -478.62                                              |
| Ce | -486.30                                                                                | -486.23                                                             | -485.78                                              |
| Pr | -522.84                                                                                | -525.06                                                             | -522.59                                              |
| Nd | -535.61                                                                                | -549.20                                                             | -544.21                                              |
| Sm | -504.59                                                                                | -505.01                                                             | -505.80                                              |
| Eu | -452.81                                                                                | -452.57                                                             | -452.52                                              |
| Gd | -508.40                                                                                | -508.49                                                             | -508.19                                              |
| Tb | -514.96                                                                                | -515.16                                                             | -514.87                                              |
| Dy | -513.67                                                                                | -513.76                                                             | -514.33                                              |
| Ho | -577.88                                                                                | -582.51                                                             | -581.12                                              |
| Er | -583.26                                                                                | -591.30                                                             | -588.23                                              |
| Tm | -569.67                                                                                | -573.34                                                             | -571.96                                              |
| Yb | -514.44                                                                                | -514.07                                                             | -519.54                                              |
| Lu | -530.75                                                                                | -530.52                                                             | -530.31                                              |

Table S.3: Relative computational cost calculated with f-ccCA and the target method for  $[\text{Ln}(\text{NO}_3)]^{+2}$  (with Ln = La, Ce, Sm, and Lu). [Relative computational cost is shown as a percentage and it is calculated as relative cost = (CPU units with f-ccCA)/(CPU units with target method) x 100]. Values shown in CPU units.

| <b>Ln</b> | <b>CCSD(T)-FSII /cc-pwCV<math>\infty</math>Z-DK3+SO<br/>(target)</b> | <b>f-ccCA</b> | <b>Relative<br/>Cost</b> |
|-----------|----------------------------------------------------------------------|---------------|--------------------------|
| <b>La</b> | 95.07                                                                | 11.28         | 12%                      |
| <b>Ce</b> | 61.96                                                                | 14.20         | 23%                      |
| <b>Sm</b> | 64.64                                                                | 9.82          | 15%                      |
| <b>Lu</b> | 77.89                                                                | 10.39         | 13%                      |
